# Supplementary material for: An ab initio MO study of heavy atom effects on the zero-field splitting tensors of high-spin nitrenes: how the spin–orbit contributions are affected
Source: Royal Society of Chemistry journal article supplement (doi:10.1039/c4cp00822g), 2014-01-01
Supplement: c4cp00822g1.pdf [file c4cp00822g1.pdf]

## Electronic Supplementary Information

### Contents

1. Cartesian coordinates, UHCTH/407 energies, and  $\langle S^2 \rangle$  values of **1–3** and **9–13**.
2. DFT calculations of the  $\mathbf{D}^{\text{SO}}$  tensors of **1–3**.
3. UBP86/cc-pVDZ frontier orbitals of **3**.
4. Spin configuration-based and orbital region partitioning-based analyses of the  $\mathbf{D}^{\text{SO}}$  tensors of **1,2**, and **9–12**, as calculated at PK-DFT.

1. Cartesian coordinates, UHCTH/407 energies, and  $\langle S^2 \rangle$  values of **1–3** and **9–13**.

Cartesian coordinates of **1** optimized at the UHCTH/407/6-31G\* level.

| Center<br>Number | Atomic<br>Number | Atomic<br>Type | Coordinates (Angstroms) |           |           |
|------------------|------------------|----------------|-------------------------|-----------|-----------|
|                  |                  |                | X                       | Y         | Z         |
| 1                | 7                | 0              | 0.000000                | 0.000000  | -1.708049 |
| 2                | 6                | 0              | 0.000000                | 1.170228  | -1.016218 |
| 3                | 6                | 0              | 0.000000                | 1.204506  | 0.412401  |
| 4                | 6                | 0              | 0.000000                | 0.000000  | 1.183266  |
| 5                | 6                | 0              | 0.000000                | -1.204506 | 0.412401  |
| 6                | 6                | 0              | 0.000000                | -1.170228 | -1.016218 |
| 7                | 7                | 0              | 0.000000                | 2.307512  | -1.728736 |
| 8                | 9                | 0              | 0.000000                | 2.369597  | 1.041293  |
| 9                | 7                | 0              | 0.000000                | 0.000000  | 2.508798  |
| 10               | 9                | 0              | 0.000000                | -2.369597 | 1.041293  |
| 11               | 7                | 0              | 0.000000                | -2.307512 | -1.728736 |

E(UHCTH/407/6-31G\*) = -608.749683960 Hartree

$\langle S^2 \rangle$  = 12.0854

Cartesian coordinates of **2** optimized at the UHCTH/407/6-31G\* level.

| Center<br>Number | Atomic<br>Number | Atomic<br>Type | Coordinates (Angstroms) |           |           |
|------------------|------------------|----------------|-------------------------|-----------|-----------|
|                  |                  |                | X                       | Y         | Z         |
| 1                | 7                | 0              | 0.000000                | 0.000000  | -1.946777 |
| 2                | 6                | 0              | 0.000000                | 1.169930  | -1.259616 |
| 3                | 6                | 0              | 0.000000                | 1.220916  | 0.174854  |
| 4                | 6                | 0              | 0.000000                | 0.000000  | 0.931949  |
| 5                | 6                | 0              | 0.000000                | -1.220916 | 0.174854  |
| 6                | 6                | 0              | 0.000000                | -1.169930 | -1.259616 |
| 7                | 7                | 0              | 0.000000                | 2.284817  | -2.003643 |
| 8                | 17               | 0              | 0.000000                | 2.722360  | 0.979948  |
| 9                | 7                | 0              | 0.000000                | 0.000000  | 2.255095  |
| 10               | 17               | 0              | 0.000000                | -2.722360 | 0.979948  |
| 11               | 7                | 0              | 0.000000                | -2.284817 | -2.003643 |

-----  
E(UHCTH/407/6-31G\*) = -1329.63453431 Hartree

<S<sup>2</sup>> = 12.0897

Cartesian coordinates of 3 optimized at the UHCTH/407/6-31G\* level.

-----

| Center<br>Number | Atomic<br>Number | Atomic<br>Type | Coordinates (Angstroms) |           |           |
|------------------|------------------|----------------|-------------------------|-----------|-----------|
|                  |                  |                | X                       | Y         | Z         |
| 1                | 7                | 0              | 0.000000                | 0.000000  | 2.259905  |
| 2                | 6                | 0              | 0.000000                | 1.169681  | 1.571121  |
| 3                | 6                | 0              | 0.000000                | 1.218211  | 0.139351  |
| 4                | 6                | 0              | 0.000000                | 0.000000  | -0.616619 |
| 5                | 6                | 0              | 0.000000                | -1.218211 | 0.139351  |
| 6                | 6                | 0              | 0.000000                | -1.169681 | 1.571121  |
| 7                | 7                | 0              | 0.000000                | 2.285249  | 2.314979  |
| 8                | 35               | 0              | 0.000000                | 2.857269  | -0.735239 |
| 9                | 7                | 0              | 0.000000                | 0.000000  | -1.941184 |
| 10               | 35               | 0              | 0.000000                | -2.857269 | -0.735239 |
| 11               | 7                | 0              | 0.000000                | -2.285249 | 2.314979  |

-----

E(UHCTH/407/6-31G\*) = -5555.31677723 Hartree

<S<sup>2</sup>> = 12.0893

Cartesian coordinates of 9 optimized at the UHCTH/407/Sapporo-DZP-2012 level.

-----

| Center<br>Number | Atomic<br>Number | Atomic<br>Type | Coordinates (Angstroms) |           |           |
|------------------|------------------|----------------|-------------------------|-----------|-----------|
|                  |                  |                | X                       | Y         | Z         |
| 1                | 6                | 0              | 0.000000                | 0.000000  | -1.512480 |
| 2                | 6                | 0              | 0.000000                | 1.227556  | -0.775103 |
| 3                | 6                | 0              | 0.000000                | 1.221988  | 0.605756  |
| 4                | 6                | 0              | 0.000000                | 0.000000  | 1.282667  |
| 5                | 6                | 0              | 0.000000                | -1.221988 | 0.605756  |
| 6                | 6                | 0              | 0.000000                | -1.227556 | -0.775103 |
| 7                | 7                | 0              | 0.000000                | 0.000000  | -2.840965 |
| 8                | 1                | 0              | 0.000000                | 2.165149  | -1.330271 |
| 9                | 1                | 0              | 0.000000                | 2.148298  | 1.180062  |
| 10               | 9                | 0              | 0.000000                | 0.000000  | 2.622025  |

-----

|    |   |   |          |           |           |
|----|---|---|----------|-----------|-----------|
| 11 | 1 | 0 | 0.000000 | -2.148298 | 1.180062  |
| 12 | 1 | 0 | 0.000000 | -2.165149 | -1.330271 |

-----  
E(UHCTH/407/Sapporo-DZP-2012) = -385.489491225 Hartree

<S<sup>2</sup>> = 2.0306

Cartesian coordinates of **10** optimized at the UHCTH/407/Sapporo-DZP-2012 level.

| Center<br>Number | Atomic<br>Number | Atomic<br>Type | Coordinates (Angstroms) |           |           |
|------------------|------------------|----------------|-------------------------|-----------|-----------|
|                  |                  |                | X                       | Y         | Z         |
| 1                | 6                | 0              | 0.000000                | 0.000000  | -1.949167 |
| 2                | 6                | 0              | 0.000000                | 1.226362  | -1.209103 |
| 3                | 6                | 0              | 0.000000                | 1.220171  | 0.170557  |
| 4                | 6                | 0              | 0.000000                | 0.000000  | 0.863579  |
| 5                | 6                | 0              | 0.000000                | -1.220171 | 0.170557  |
| 6                | 6                | 0              | 0.000000                | -1.226362 | -1.209103 |
| 7                | 7                | 0              | 0.000000                | 0.000000  | -3.274878 |
| 8                | 1                | 0              | 0.000000                | 2.165503  | -1.761900 |
| 9                | 1                | 0              | 0.000000                | 2.156187  | 0.727741  |
| 10               | 17               | 0              | 0.000000                | 0.000000  | 2.586385  |
| 11               | 1                | 0              | 0.000000                | -2.156187 | 0.727741  |
| 12               | 1                | 0              | 0.000000                | -2.165503 | -1.761900 |

-----  
E(UHCTH/407/Sapporo-DZP-2012) = -745.920465001 Hartree

<S<sup>2</sup>> = 2.0325

Cartesian coordinates of **11** optimized at the UHCTH/407/Sapporo-DZP-2012 level.

| Center<br>Number | Atomic<br>Number | Atomic<br>Type | Coordinates (Angstroms) |           |           |
|------------------|------------------|----------------|-------------------------|-----------|-----------|
|                  |                  |                | X                       | Y         | Z         |
| 1                | 6                | 0              | 0.000000                | 0.000000  | -2.587747 |
| 2                | 6                | 0              | 0.000000                | 1.226304  | -1.847999 |
| 3                | 6                | 0              | 0.000000                | 1.220649  | -0.467567 |
| 4                | 6                | 0              | 0.000000                | 0.000000  | 0.222673  |
| 5                | 6                | 0              | 0.000000                | -1.220649 | -0.467567 |
| 6                | 6                | 0              | 0.000000                | -1.226304 | -1.847999 |
| 7                | 7                | 0              | 0.000000                | 0.000000  | -3.913537 |

|    |    |   |          |           |           |
|----|----|---|----------|-----------|-----------|
| 8  | 1  | 0 | 0.000000 | 2.165701  | -2.400513 |
| 9  | 1  | 0 | 0.000000 | 2.159288  | 0.084822  |
| 10 | 35 | 0 | 0.000000 | 0.000000  | 2.114382  |
| 11 | 1  | 0 | 0.000000 | -2.159288 | 0.084822  |
| 12 | 1  | 0 | 0.000000 | -2.165701 | -2.400513 |

-----  
E(UHCTH/407/Sapporo-DZP-2012) = -2861.22510531 Hartree

<S<sup>2</sup>> = 2.0326

Cartesian coordinates of **12** optimized at the UHCTH/407/Sapporo-DZP-2012 level.

| Center<br>Number | Atomic<br>Number | Atomic<br>Type | Coordinates (Angstroms) |           |           |
|------------------|------------------|----------------|-------------------------|-----------|-----------|
|                  |                  |                | X                       | Y         | Z         |
| 1                | 6                | 0              | 0.000000                | 0.000000  | -3.086843 |
| 2                | 6                | 0              | 0.000000                | 1.225931  | -2.346724 |
| 3                | 6                | 0              | 0.000000                | 1.220272  | -0.966082 |
| 4                | 6                | 0              | 0.000000                | 0.000000  | -0.271241 |
| 5                | 6                | 0              | 0.000000                | -1.220272 | -0.966082 |
| 6                | 6                | 0              | 0.000000                | -1.225931 | -2.346724 |
| 7                | 7                | 0              | 0.000000                | 0.000000  | -4.412301 |
| 8                | 1                | 0              | 0.000000                | 2.165677  | -2.898864 |
| 9                | 1                | 0              | 0.000000                | 2.163628  | -0.421582 |
| 10               | 53               | 0              | 0.000000                | 0.000000  | 1.838286  |
| 11               | 1                | 0              | 0.000000                | -2.163628 | -0.421582 |
| 12               | 1                | 0              | 0.000000                | -2.165677 | -2.898864 |

-----  
E(UHCTH/407/Sapporo-DZP-2012) = -7210.23006717 Hartree

<S<sup>2</sup>> = 2.0329

Cartesian coordinates of **13** optimized at the UHCTH/407/DZVP level.

| Center<br>Number | Atomic<br>Number | Atomic<br>Type | Coordinates (Angstroms) |          |           |
|------------------|------------------|----------------|-------------------------|----------|-----------|
|                  |                  |                | X                       | Y        | Z         |
| 1                | 7                | 0              | 0.000000                | 0.000000 | 2.493493  |
| 2                | 6                | 0              | 0.000000                | 1.169466 | 1.803340  |
| 3                | 6                | 0              | 0.000000                | 1.223196 | 0.371817  |
| 4                | 6                | 0              | 0.000000                | 0.000000 | -0.377973 |

|    |    |   |          |           |           |
|----|----|---|----------|-----------|-----------|
| 5  | 6  | 0 | 0.000000 | -1.223196 | 0.371817  |
| 6  | 6  | 0 | 0.000000 | -1.169466 | 1.803340  |
| 7  | 7  | 0 | 0.000000 | 2.283551  | 2.557405  |
| 8  | 53 | 0 | 0.000000 | 3.065450  | -0.614548 |
| 9  | 7  | 0 | 0.000000 | 0.000000  | -1.707148 |
| 10 | 53 | 0 | 0.000000 | -3.065450 | -0.614548 |
| 11 | 7  | 0 | 0.000000 | -2.283551 | 2.557405  |

-----  
E(UHCTH/407/DZVP) = -14256.9130462 Hartree

$\langle S^2 \rangle = 12.0924$

## 2. DFT calculations of the $\mathbf{D}^{\text{SO}}$ tensors of **1–3**.

The DFT-based  $\mathbf{D}^{\text{SO}}$  tensor calculations of **1–3** were carried out using three following approaches: Pederson–Khanna (PK), coupled-perturbed (CP), and quasi-restricted orbital (QRO) approaches. We used six pure exchange–correlation functionals (LDA, BP86, BLYP, PBE, RevPBE, and TPSS) and three basis sets (Ahlrichs-DZ, cc-pVDZ, and cc-pVTZ). In **2** and **3**, the scalar relativistic calculations were carried out using the ZORA Hamiltonian,<sup>1,2</sup> in addition to the non-relativistic calculations. All the calculations were carried out at the UHCTH/407/6-31G\* optimized geometry.

The theoretical  $D^{\text{SO}}$  values of **1–3** are summarized in Tables S1–S3, respectively. The  $D^{\text{SO}}$  values of **1–3** as calculated at the hybrid CASSCF/MRMP2 method are  $-0.0124 \text{ cm}^{-1}$ ,  $+0.0065 \text{ cm}^{-1}$ , and  $-0.2537 \text{ cm}^{-1}$ , respectively. As pointed out below, we emphasize that the DFT approaches here fail to reproduce our hybrid CASSCF/MRMP2 result.

In the DFT-based approaches, the direction of the  $D^{\text{SO}}_{zz}$  axis depends on both the theoretical methods and the basis sets. In **1**, all the DFT calculations except for QRO-TPSS give negative  $D^{\text{SO}}$  values, and the  $D^{\text{SO}}_{zz}$  axis is perpendicular to the molecular plane, which is consistent with our hybrid CASSCF/MRMP2 result. In **2**, the PK method gives the  $\mathbf{D}^{\text{SO}}$  tensor in which the  $D^{\text{SO}}_{zz}$  axis is parallel to the direction connecting two chlorine atoms, and the other two methods (CP and QRO) predict the  $D^{\text{SO}}_{zz}$  axis to be perpendicular to the molecular plane. As discussed in the present study, the hybrid CASSCF/MRMP2 method predicts that the  $D^{\text{SO}}_{zz}$  axis is parallel to the  $C_2$  symmetry axis, and therefore, importantly all the DFT approaches fail to reproduce our hybrid CASSCF/MRMP2 result even qualitatively. In **3**, the  $D^{\text{SO}}_{zz}$  axis is predicted to be parallel to the direction connecting two bromine atoms, in which case the PK or CO method is adopted in conjunction with the cc-pVDZ and cc-pVTZ basis sets. The QRO method and the CP method with Ahlrichs-DZ basis set give the  $D^{\text{SO}}_{zz}$  axis perpendicular to the molecular plane. In **3**, most calculations predict the positive sign of  $D^{\text{SO}}$ . Only the combination of the CP approach and Ahlrichs-DZ basis set gives negative  $D^{\text{SO}}$  values in **3**, but the magnitude of  $D^{\text{SO}}$  is too large to agree with the experiment, and the direction of the  $D^{\text{SO}}_{zz}$  axis is different from our hybrid CASSCF/MRMP2 result.

1 E. van Lenthe, E. J. Baerends and J. G. Snijders, *J. Chem. Phys.*, 1993, **99**, 4597–4610.

2 E. van Lenthe, J. G. Snijders and E. J. Baerends, *J. Chem. Phys.*, 1996, **105**, 6505–6516.

**Table S1** Theoretical  $D^{\text{SO}}$  values of **1** as calculated by using the DFT approaches

| Functional | Basis set   | $D^{\text{SO}}/\text{cm}^{-1}$ |         |         |
|------------|-------------|--------------------------------|---------|---------|
|            |             | PK                             | CP      | QRO     |
| LDA        | Ahlrichs-DZ | -0.0089                        | -0.0129 | -0.0040 |
|            | cc-pVDZ     | -0.0085                        | -0.0122 | -0.0041 |
|            | cc-pVTZ     | -0.0101                        | -0.0145 | -0.0046 |
| BP86       | Ahlrichs-DZ | -0.0069                        | -0.0105 | -0.0013 |
|            | cc-pVDZ     | -0.0066                        | -0.0100 | -0.0015 |
|            | cc-pVTZ     | -0.0076                        | -0.0116 | -0.0012 |
| BLYP       | Ahlrichs-DZ | -0.0078                        | -0.0116 | -0.0023 |
|            | cc-pVDZ     | -0.0075                        | -0.0110 | -0.0026 |
|            | cc-pVTZ     | -0.0089                        | -0.0131 | -0.0027 |
| PBE        | Ahlrichs-DZ | -0.0072                        | -0.0109 | -0.0014 |
|            | cc-pVDZ     | -0.0068                        | -0.0103 | -0.0016 |
|            | cc-pVTZ     | -0.0079                        | -0.0119 | -0.0014 |
| RevPBE     | Ahlrichs-DZ | -0.0068                        | -0.0104 | -0.0010 |
|            | cc-pVDZ     | -0.0065                        | -0.0099 | -0.0013 |
|            | cc-pVTZ     | -0.0074                        | -0.0113 | -0.0008 |
| TPSS       | Ahlrichs-DZ | -0.0056                        | -0.0089 | +0.0003 |
|            | cc-pVDZ     | -0.0053                        | -0.0084 | -0.0005 |
|            | cc-pVTZ     | -0.0060                        | -0.0097 | +0.0004 |



**Table S2** Theoretical  $D^{\text{SO}}$  values of **2** as calculated by using the DFT approaches. Values in parenthesis are the relativistic DFT results using ZORA Hamiltonian

| Functional | Basis set   | $D^{\text{SO}}/\text{cm}^{-1}$ |                   |                   |
|------------|-------------|--------------------------------|-------------------|-------------------|
|            |             | PK                             | CP                | QRO               |
| LDA        | Ahlrichs-DZ | +0.0171 (+0.0172)              | -0.0621 (-0.0624) | +0.1898 (+0.1912) |
|            | cc-pVDZ     | +0.0142 (+0.0141)              | -0.0498 (-0.0494) | +0.1480 (+0.1465) |
|            | cc-pVTZ     | +0.0164 (+0.0163)              | -0.0608 (-0.0607) | +0.1889 (+0.1884) |
| BP86       | Ahlrichs-DZ | +0.0125 (+0.0126)              | -0.0529 (-0.0532) | +0.1689 (+0.1699) |
|            | cc-pVDZ     | +0.0105 (+0.0104)              | -0.0433 (-0.0430) | +0.1385 (+0.1382) |
|            | cc-pVTZ     | +0.0117 (+0.0117)              | -0.0523 (-0.0522) | +0.1754 (+0.1750) |
| BLYP       | Ahlrichs-DZ | +0.0146 (+0.0147)              | -0.0565 (-0.0567) | +0.1762 (+0.1774) |
|            | cc-pVDZ     | +0.0122 (+0.0121)              | -0.0455 (-0.0452) | +0.1396 (+0.1382) |
|            | cc-pVTZ     | +0.0140 (+0.0140)              | -0.0558 (-0.0557) | +0.1792 (+0.1788) |
| PBE        | Ahlrichs-DZ | +0.0127 (+0.0129)              | -0.0535 (-0.0538) | +0.1708 (+0.1720) |
|            | cc-pVDZ     | +0.0107 (+0.0106)              | -0.0439 (-0.0435) | +0.1403 (+0.1389) |
|            | cc-pVTZ     | +0.0119 (+0.0119)              | -0.0528 (-0.0527) | +0.1766 (+0.1763) |
| RevPBE     | Ahlrichs-DZ | +0.0118 (+0.0118)              | -0.0515 (-0.0518) | +0.1654 (+0.1665) |
|            | cc-pVDZ     | +0.0099 (+0.0098)              | -0.0426 (-0.0423) | +0.1385 (+0.1372) |
|            | cc-pVTZ     | +0.0109 (+0.0109)              | -0.0508 (-0.0507) | +0.1729 (+0.1726) |
| TPSS       | Ahlrichs-DZ | +0.0094 (+0.0094)              | -0.0457 (-0.0459) | +0.1457 (+0.1468) |
|            | cc-pVDZ     | +0.0079 (+0.0078)              | -0.0386 (-0.0383) | +0.1278 (+0.1266) |
|            | cc-pVTZ     | +0.0087 (+0.0087)              | -0.0464 (-0.0463) | +0.1602 (+0.1600) |

**Table S3** Theoretical  $D^{\text{SO}}$  values of **3** as calculated by using the DFT approaches. Values in parenthesis are the relativistic DFT results using ZORA Hamiltonian

| Functional | Basis set   | $D^{\text{SO}}/\text{cm}^{-1}$ |                   |                   |
|------------|-------------|--------------------------------|-------------------|-------------------|
|            |             | PK                             | CP                | QRO               |
| LDA        | Ahlrichs-DZ | +0.2911 (+0.3184)              | -1.1922 (-1.3096) | +4.4348 (+4.8856) |
|            | cc-pVDZ     | +0.2545 (+0.2193)              | +1.1960 (+1.0570) | +4.3017 (+3.8276) |
|            | cc-pVTZ     | +0.2884 (+0.2566)              | +1.4471 (+1.3158) | +5.5162 (+5.0369) |
| BP86       | Ahlrichs-DZ | +0.1962 (+0.2148)              | -1.0247 (-1.1269) | +3.9214 (+4.3243) |
|            | cc-pVDZ     | +0.1713 (+0.1482)              | +1.0289 (+0.9133) | +3.9856 (+3.5517) |
|            | cc-pVTZ     | +0.1871 (+0.1673)              | +1.2374 (+1.1300) | +5.1055 (+4.6696) |
| BLYP       | Ahlrichs-DZ | +0.2384 (+0.2610)              | -1.0765 (-1.1826) | +4.0690 (+4.4811) |
|            | cc-pVDZ     | +0.2077 (+0.1794)              | +1.0833 (+0.9593) | +4.0440 (+3.5991) |
|            | cc-pVTZ     | +0.2331 (+0.2080)              | +1.3139 (+1.1978) | +5.2148 (+4.7681) |
| PBE        | Ahlrichs-DZ | +0.1978 (+0.2166)              | -1.0349 (-1.1390) | +3.9959 (+4.4096) |
|            | cc-pVDZ     | +0.1727 (+0.1494)              | +1.0326 (+0.9166) | +4.0407 (+3.6008) |
|            | cc-pVTZ     | +0.1877 (+0.1681)              | +1.2354 (+1.1291) | +5.1425 (+4.7063) |
| RevPBE     | Ahlrichs-DZ | +0.1788 (+0.1959)              | -1.0060 (-1.1081) | +3.9008 (+4.3073) |
|            | cc-pVDZ     | +0.1566 (+0.1357)              | +1.0051 (+0.8936) | +3.9943 (+3.5623) |
|            | cc-pVTZ     | +0.1674 (+0.1502)              | +1.1946 (+1.0933) | +5.0537 (+4.6299) |
| TPSS       | Ahlrichs-DZ | +0.1372 (+0.1504)              | -0.8882 (-0.9800) | +3.3625 (+3.7203) |
|            | cc-pVDZ     | +0.1208 (+0.1047)              | +0.9241 (+0.8238) | +3.6809 (+3.2911) |
|            | cc-pVTZ     | +0.1293 (+0.1160)              | +1.1105 (+1.0174) | +4.7038 (+4.3108) |

3. UBP86/cc-pVDZ frontier orbitals of **3**.

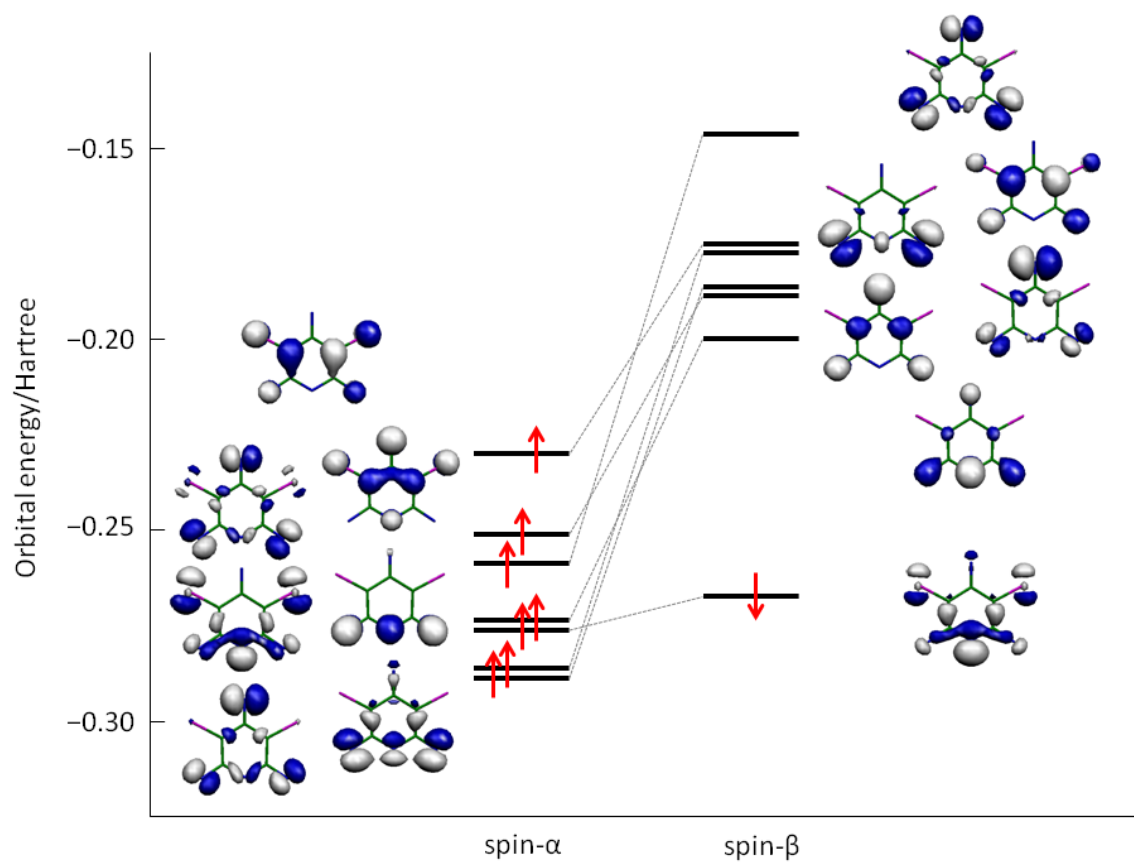

Fig. S1. UBP86/cc-pVDZ frontier orbitals of **3**. Red arrows denote electron occupations.

4. Spin configuration-based and orbital region partitioning-based analyses of the  $\mathbf{D}^{\text{SO}}$  tensors of **1**, **2**, and **9–12** as calculated at PK-DFT.

The  $\mathbf{D}^{\text{SO}}$  tensors calculated by means of Pederson–Khanna DFT approach can be analyzed in terms of the spin configuration-based method and the orbital region partitioning-based method, which has been proposed by us. All the calculations were carried out by using GAMESS-US software and laboratory-coded programs. The BP86 exchange–correlation functional was used for all the calculations. The cc-pVDZ and the Sapporo-DZP-2012 basis sets were used for **1** and **2**, and for **9–12**, respectively. The spin–orbit coupling integrals were evaluated using one-electron SOC Hamiltonian with effective nuclear charges (ZEFTYP=3-21G in GAMESS input). The decomposed  $\mathbf{D}^{\text{SO}}$  tensors are given in Tables S4–S9.

**Table S4** The decomposed  $\mathbf{D}^{\text{SO}}$  tensor of **1** on the basis of the spin configurations and orbital region partitioning.

| Excitations                 | $D_{xx}/\text{cm}^{-1}$ | $D_{yy}/\text{cm}^{-1}$ | $D_{zz}/\text{cm}^{-1}$ |
|-----------------------------|-------------------------|-------------------------|-------------------------|
| $\alpha \rightarrow \alpha$ | -0.03507                | -0.03793                | -0.03638                |
| $\beta \rightarrow \beta$   | -0.03898                | -0.04543                | -0.04008                |
| $\alpha \rightarrow \beta$  | 0.04251                 | 0.06242                 | 0.05716                 |
| $\beta \rightarrow \alpha$  | 0.03144                 | 0.03202                 | 0.02922                 |
| DOR $\rightarrow$ UOR       | 0.00002                 | 0.00015                 | 0.00010                 |
| SOR $\rightarrow$ UOR       | -0.00003                | -0.00006                | -0.00005                |
| DOR $\rightarrow$ SOR       | 0.00295                 | 0.01130                 | 0.00868                 |
| SOR $\rightarrow$ SOR       | -0.00304                | -0.00031                | 0.00118                 |

**Table S5** The decomposed  $\mathbf{D}^{\text{SO}}$  tensor of **2** on the basis of the spin configurations and orbital region partitioning.

| Excitations                 | $D_{xx}/\text{cm}^{-1}$ | $D_{yy}/\text{cm}^{-1}$ | $D_{zz}/\text{cm}^{-1}$ |
|-----------------------------|-------------------------|-------------------------|-------------------------|
| $\alpha \rightarrow \alpha$ | -0.73145                | -0.63856                | -0.69632                |
| $\beta \rightarrow \beta$   | -0.73203                | -0.71875                | -0.73626                |
| $\alpha \rightarrow \beta$  | 0.73596                 | 0.75718                 | 0.76823                 |
| $\beta \rightarrow \alpha$  | 0.72669                 | 0.61812                 | 0.67301                 |
| DOR $\rightarrow$ UOR       | 0.00065                 | 0.00057                 | 0.00078                 |
| SOR $\rightarrow$ UOR       | -0.00071                | -0.00092                | -0.00138                |
| DOR $\rightarrow$ SOR       | 0.00352                 | 0.02267                 | 0.00723                 |
| SOR $\rightarrow$ SOR       | -0.00429                | -0.00433                | 0.00203                 |

**Table S6** The decomposed  $\mathbf{D}^{\text{SO}}$  tensor of **9** on the basis of the spin configurations and orbital region partitioning.

| Excitations                 | $D_{xx}/\text{cm}^{-1}$ | $D_{yy}/\text{cm}^{-1}$ | $D_{zz}/\text{cm}^{-1}$ |
|-----------------------------|-------------------------|-------------------------|-------------------------|
| $\alpha \rightarrow \alpha$ | -2.23000                | -2.75714                | -1.16286                |
| $\beta \rightarrow \beta$   | -2.07143                | -2.52178                | -1.10907                |
| $\alpha \rightarrow \beta$  | 2.23702                 | 2.76597                 | 1.26205                 |
| $\beta \rightarrow \alpha$  | 2.06095                 | 2.50999                 | 1.07332                 |
| DOR $\rightarrow$ UOR       | -0.00005                | 0.00027                 | 0.00001                 |
| SOR $\rightarrow$ UOR       | -0.00109                | -0.00183                | -0.00001                |
| DOR $\rightarrow$ SOR       | -0.00232                | -0.00142                | 0.00836                 |
| SOR $\rightarrow$ SOR       | 0.00000                 | 0.00000                 | 0.05508                 |

**Table S7** The decomposed  $\mathbf{D}^{\text{SO}}$  tensor of **10** on the basis of the spin configurations and orbital region partitioning.

| Excitations                 | $D_{xx}/\text{cm}^{-1}$ | $D_{yy}/\text{cm}^{-1}$ | $D_{zz}/\text{cm}^{-1}$ |
|-----------------------------|-------------------------|-------------------------|-------------------------|
| $\alpha \rightarrow \alpha$ | -63.57499               | -81.09573               | -44.87691               |
| $\beta \rightarrow \beta$   | -63.23203               | -79.41198               | -44.93132               |
| $\alpha \rightarrow \beta$  | 63.41209                | 81.01547                | 45.15162                |
| $\beta \rightarrow \alpha$  | 63.39056                | 79.47558                | 44.70543                |
| DOR $\rightarrow$ UOR       | 0.00031                 | 0.01017                 | 0.00008                 |
| SOR $\rightarrow$ UOR       | -0.00234                | -0.02396                | -0.00008                |
| DOR $\rightarrow$ SOR       | -0.00235                | -0.00287                | 0.01048                 |
| SOR $\rightarrow$ SOR       | 0.00000                 | 0.00000                 | 0.03834                 |

**Table S8** The decomposed  $\mathbf{D}^{\text{SO}}$  tensor of **11** on the basis of the spin configurations and orbital region partitioning.

| Excitations                 | $D_{xx}/\text{cm}^{-1}$ | $D_{yy}/\text{cm}^{-1}$ | $D_{zz}/\text{cm}^{-1}$ |
|-----------------------------|-------------------------|-------------------------|-------------------------|
| $\alpha \rightarrow \alpha$ | -5988.45701             | -6528.10178             | -4464.22181             |
| $\beta \rightarrow \beta$   | -5971.47814             | -6406.47197             | -4458.72340             |
| $\alpha \rightarrow \beta$  | 5971.15302              | 6510.77034              | 4466.16947              |
| $\beta \rightarrow \alpha$  | 5988.78324              | 6422.29560              | 4456.76789              |
| DOR $\rightarrow$ UOR       | 0.11334                 | 1.48831                 | 0.00934                 |
| SOR $\rightarrow$ UOR       | -0.10938                | -2.96260                | -0.01166                |
| DOR $\rightarrow$ SOR       | -0.00285                | -0.03352                | -0.00722                |
| SOR $\rightarrow$ SOR       | 0.00000                 | 0.00000                 | 0.00170                 |

**Table S9** The decomposed  $\mathbf{D}^{\text{SO}}$  tensor of **12** on the basis of the spin configurations and orbital region partitioning.

| Excitations                 | $D_{xx}/\text{cm}^{-1}$ | $D_{yy}/\text{cm}^{-1}$ | $D_{zz}/\text{cm}^{-1}$ |
|-----------------------------|-------------------------|-------------------------|-------------------------|
| $\alpha \rightarrow \alpha$ | -30575.83214            | -31869.52931            | -24168.95133            |
| $\beta \rightarrow \beta$   | -30536.72331            | -31457.69619            | -24161.25987            |
| $\alpha \rightarrow \beta$  | 30532.77439             | 31853.89979             | 24200.00438             |
| $\beta \rightarrow \alpha$  | 30579.79862             | 31470.03486             | 24129.99989             |
| DOR $\rightarrow$ UOR       | 0.83321                 | 3.99230                 | 0.20160                 |
| SOR $\rightarrow$ UOR       | -0.80813                | -7.02860                | -0.31688                |
| DOR $\rightarrow$ SOR       | -0.00753                | -0.25456                | -0.65933                |
| SOR $\rightarrow$ SOR       | 0.00000                 | 0.00000                 | 0.56767                 |
